# Supplementary material
Source: Springer Nature journal article supplement (https://www.springermedizin.de/resource/supplementary/12958_2008_431_MOESM5_ESM.pdf/9567870)

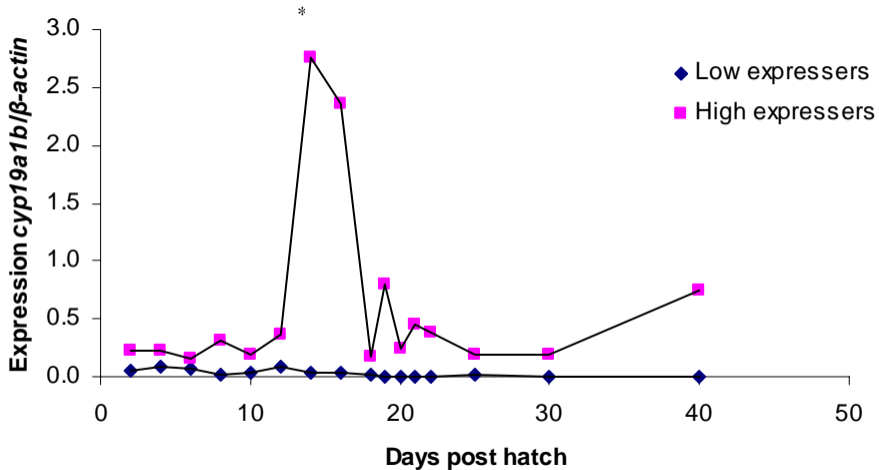

Supplement: MOESM5 [file 9567870]
